# Supplementary material for: Atranorin driven by nano materials SPION lead to ferroptosis of gastric cancer stem cells by weakening the mRNA 5-hydroxymethylcytidine modification of the Xc-/GPX4 axis and its expression
Source: PubMed Central journal article supplement (PMC9553860; doi:10.7150/ijms.73701), 2022-09-25
Supplement: ijmsv19p1680s1.pdf [file ijmsv19p1680s1.pdf]

Atranorin driven by nano materials SPION lead to ferroptosis of gastric cancer stem cells by weakening the mRNA 5-hydroxymethylcytidine modification of the Xc-/GPX4 axis and its expression

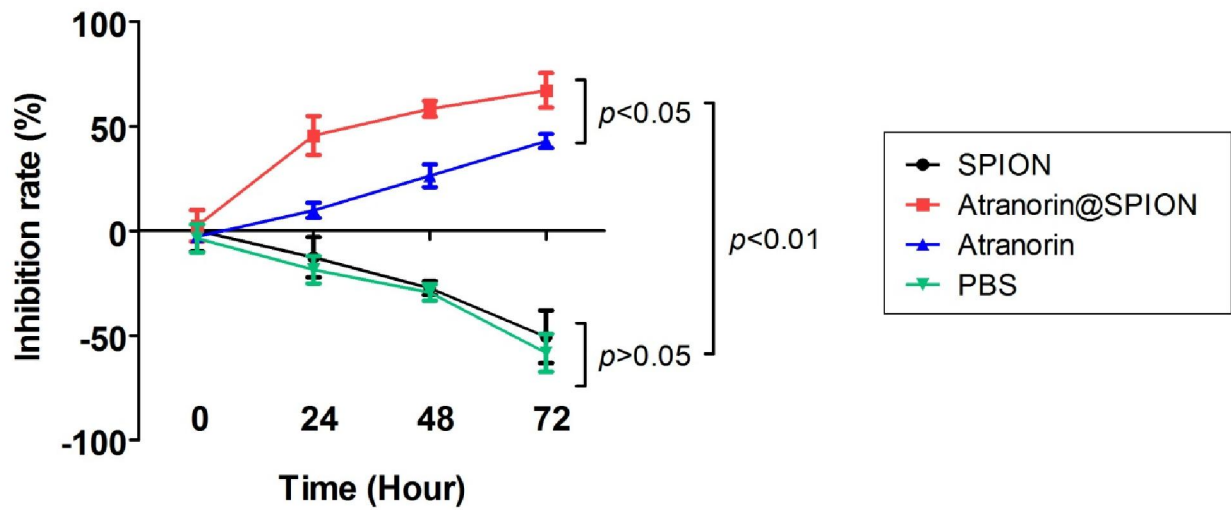

Figure S1 The results of MTT assay

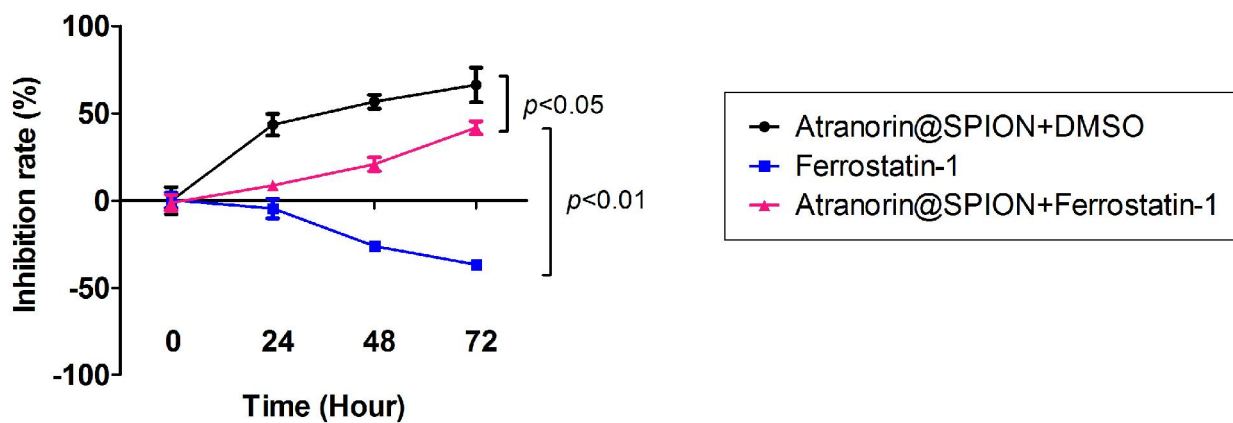

Figure S2 The results of MTT assay

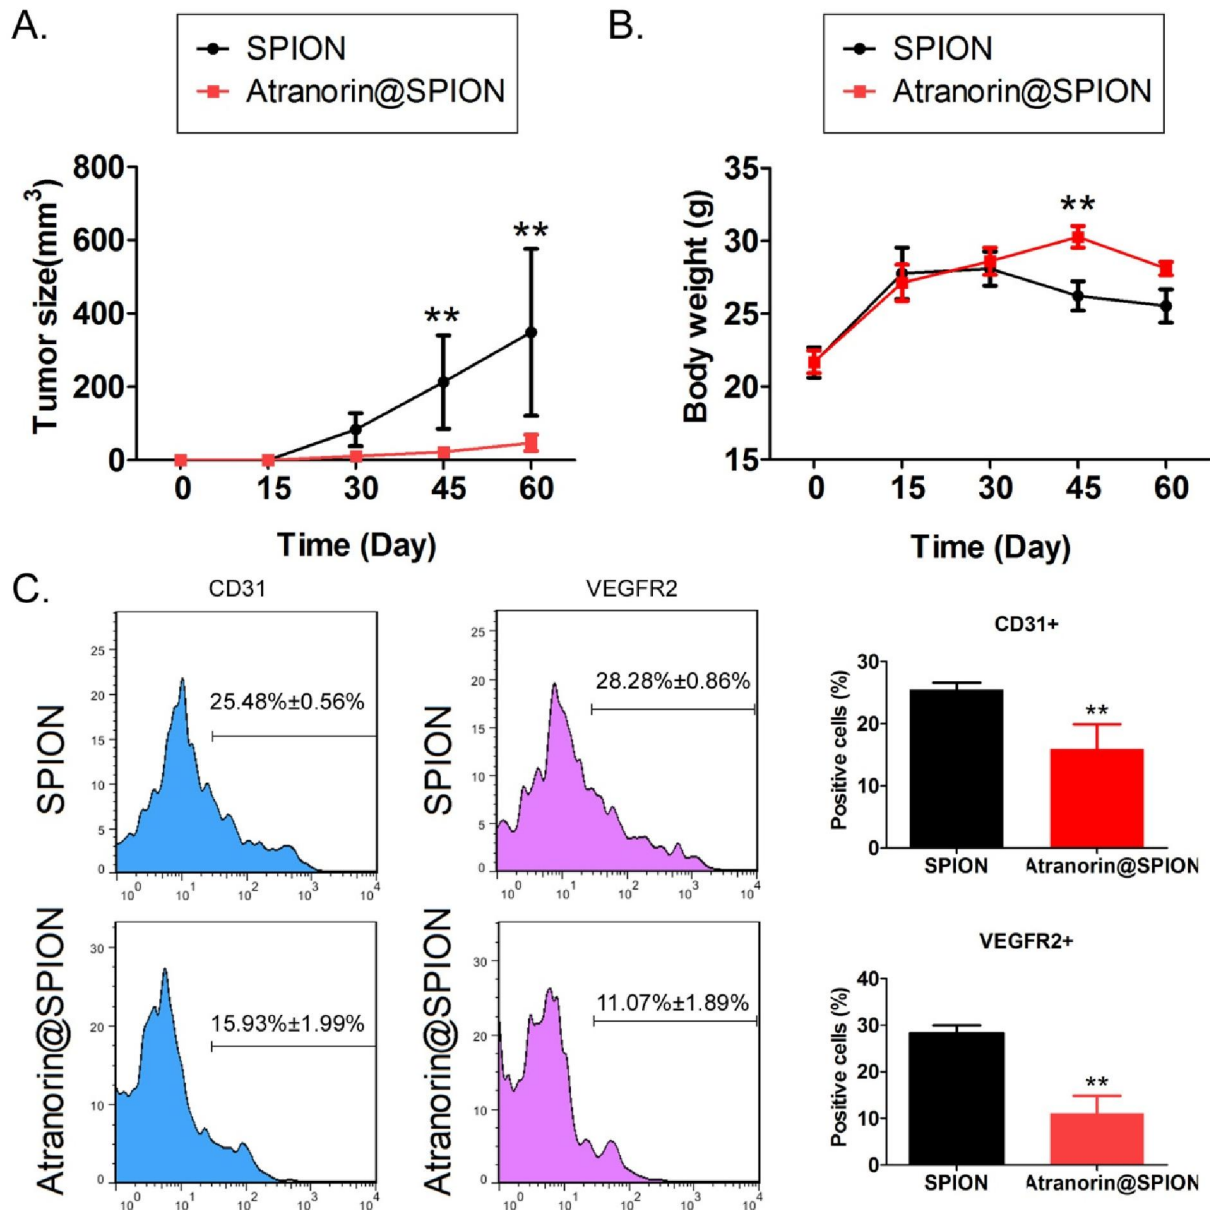

**Figure S3 Atranolin@SPION significantly weakened the tumorigenicity of CD44+/ CD24+ GCSCs in immunodeficient mice.**

(A) Tumor volume. \* $p < 0.05$  vs. SPION; t test;  $n = 4$ . (B) Mice body weight. \* $p < 0.05$  vs. SPION; t test;  $n = 4$ . (C) Angiogenic biomarkers (CD31+, VEGFR2) assay. \*\* $p < 0.01$  vs. SPION; t test;  $n = 4$ .
